# Supplementary material for: Heterogeneity in global gene expression profiles between biopsy specimens taken peri-surgically from primary ER-positive breast carcinomas
Source: Springer Nature journal article supplement (doi:10.1186/s13058-016-0696-2), 2016-03-31

Figure S1

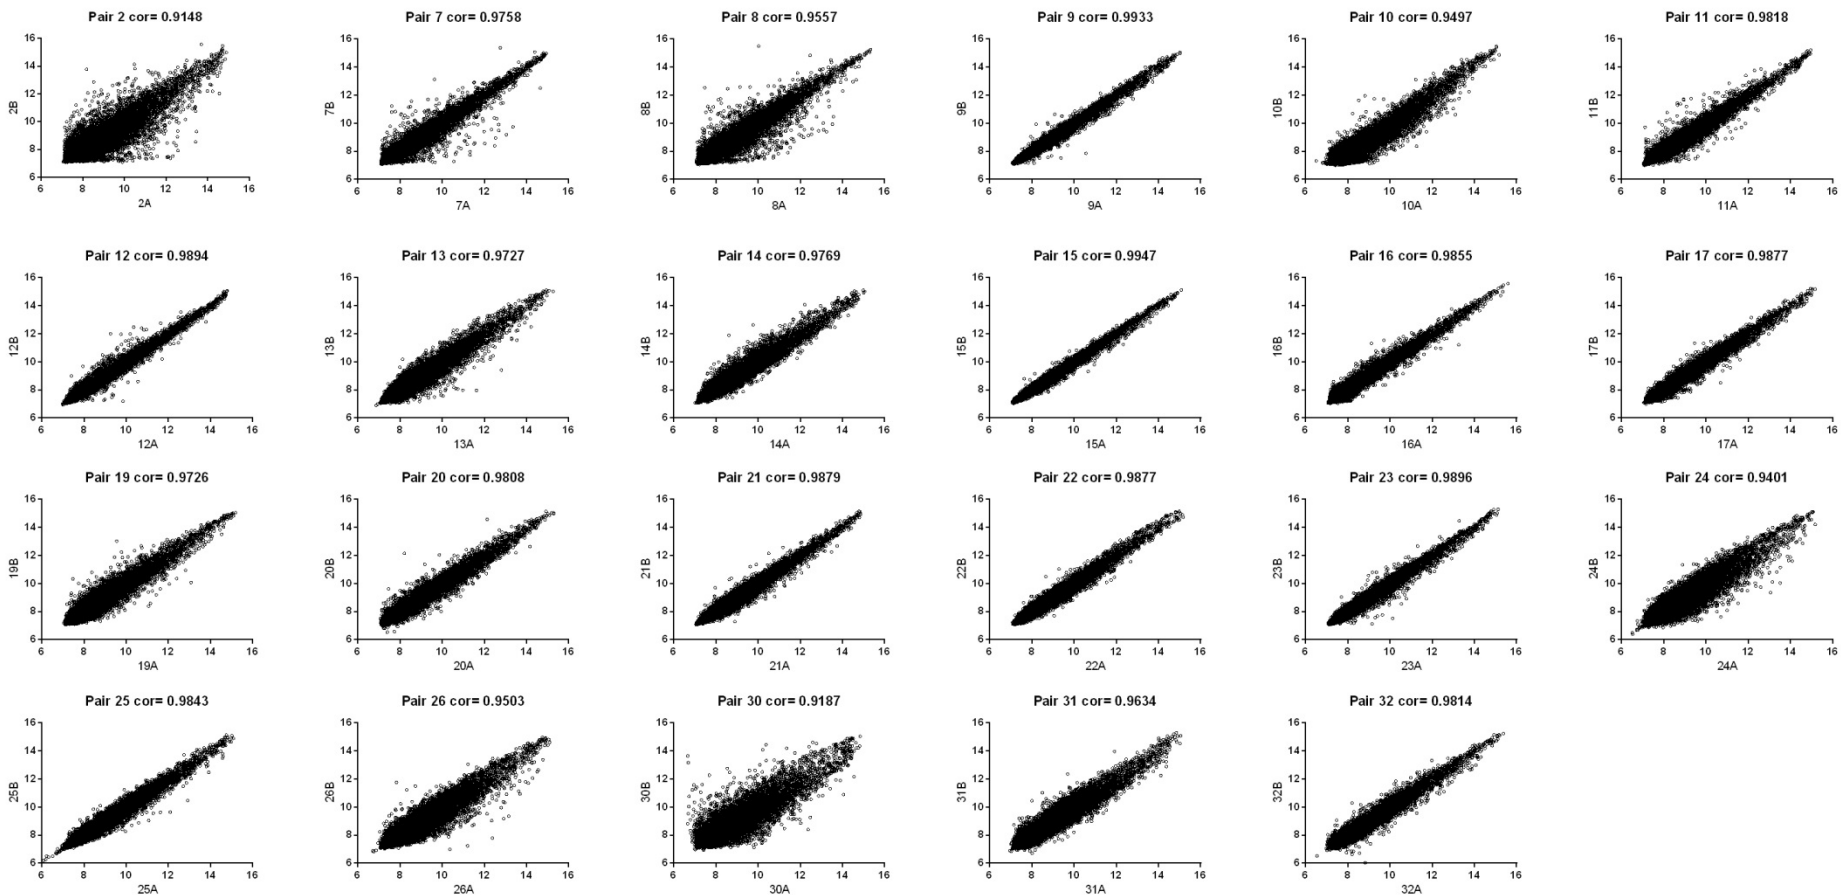

Figure S2

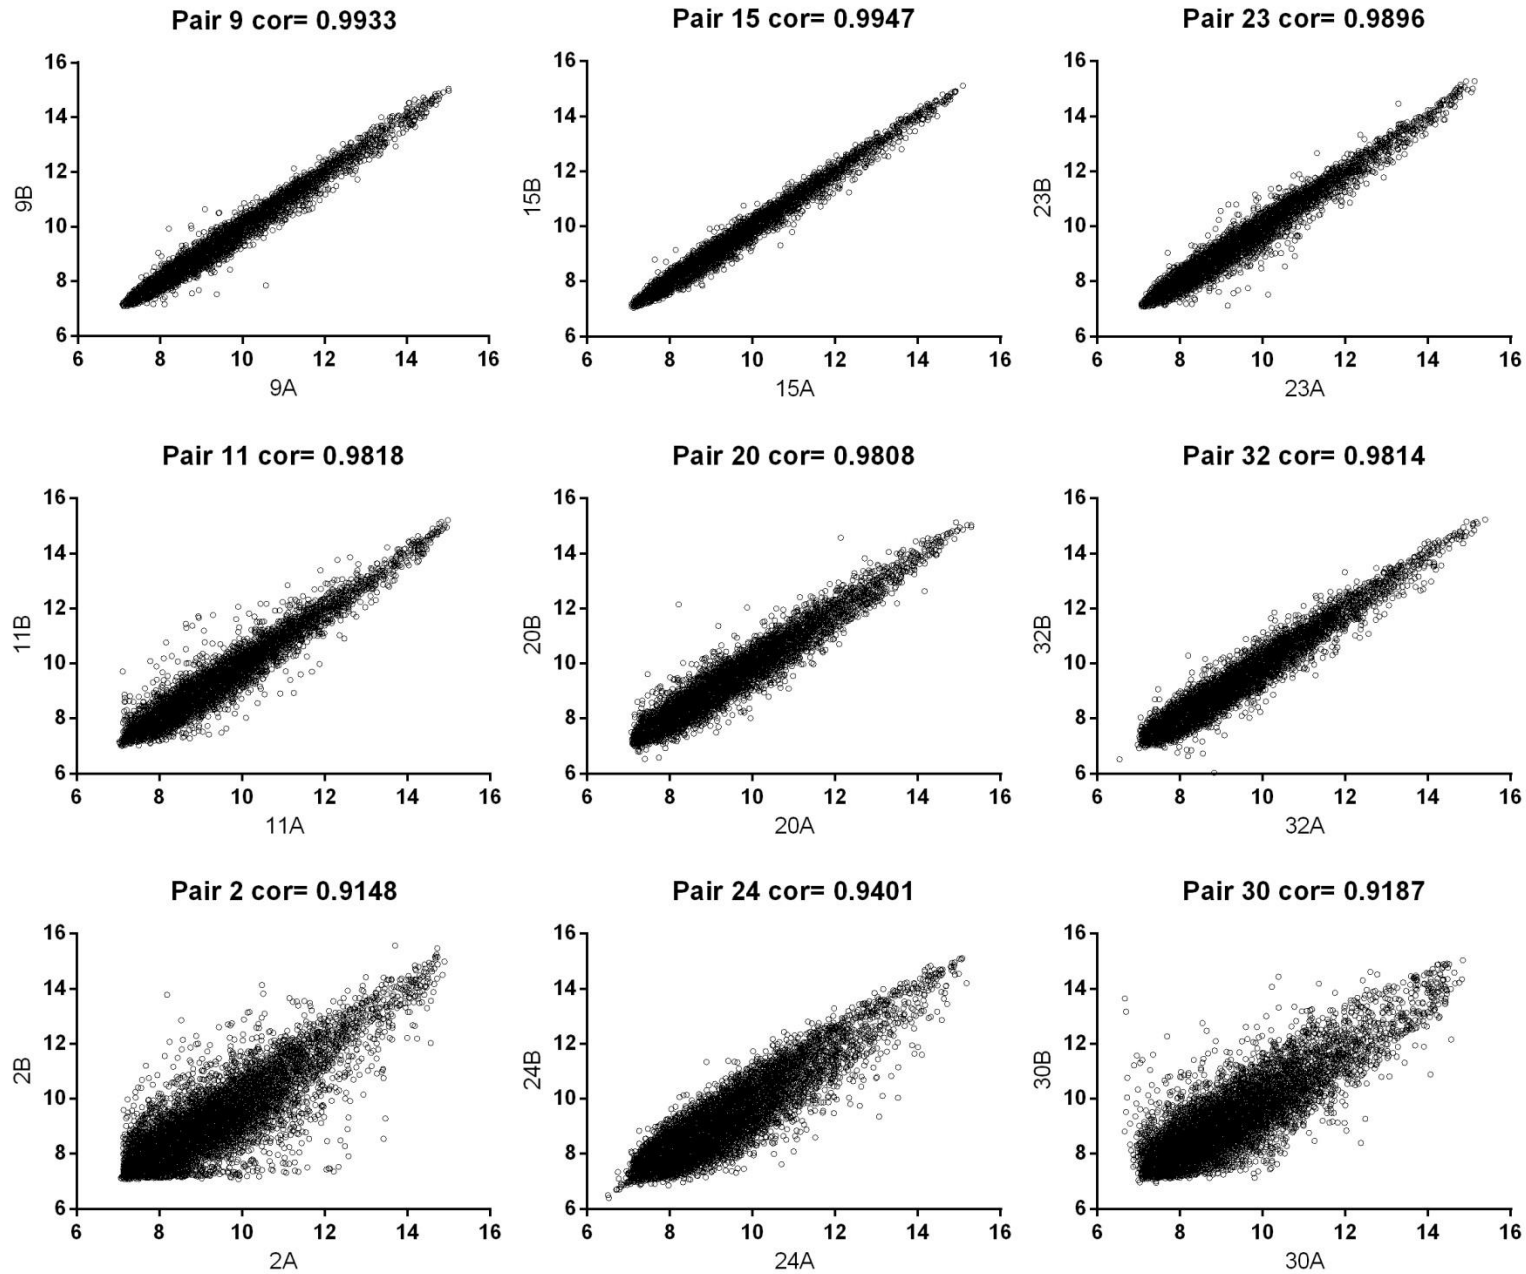

Figure S3

Study I

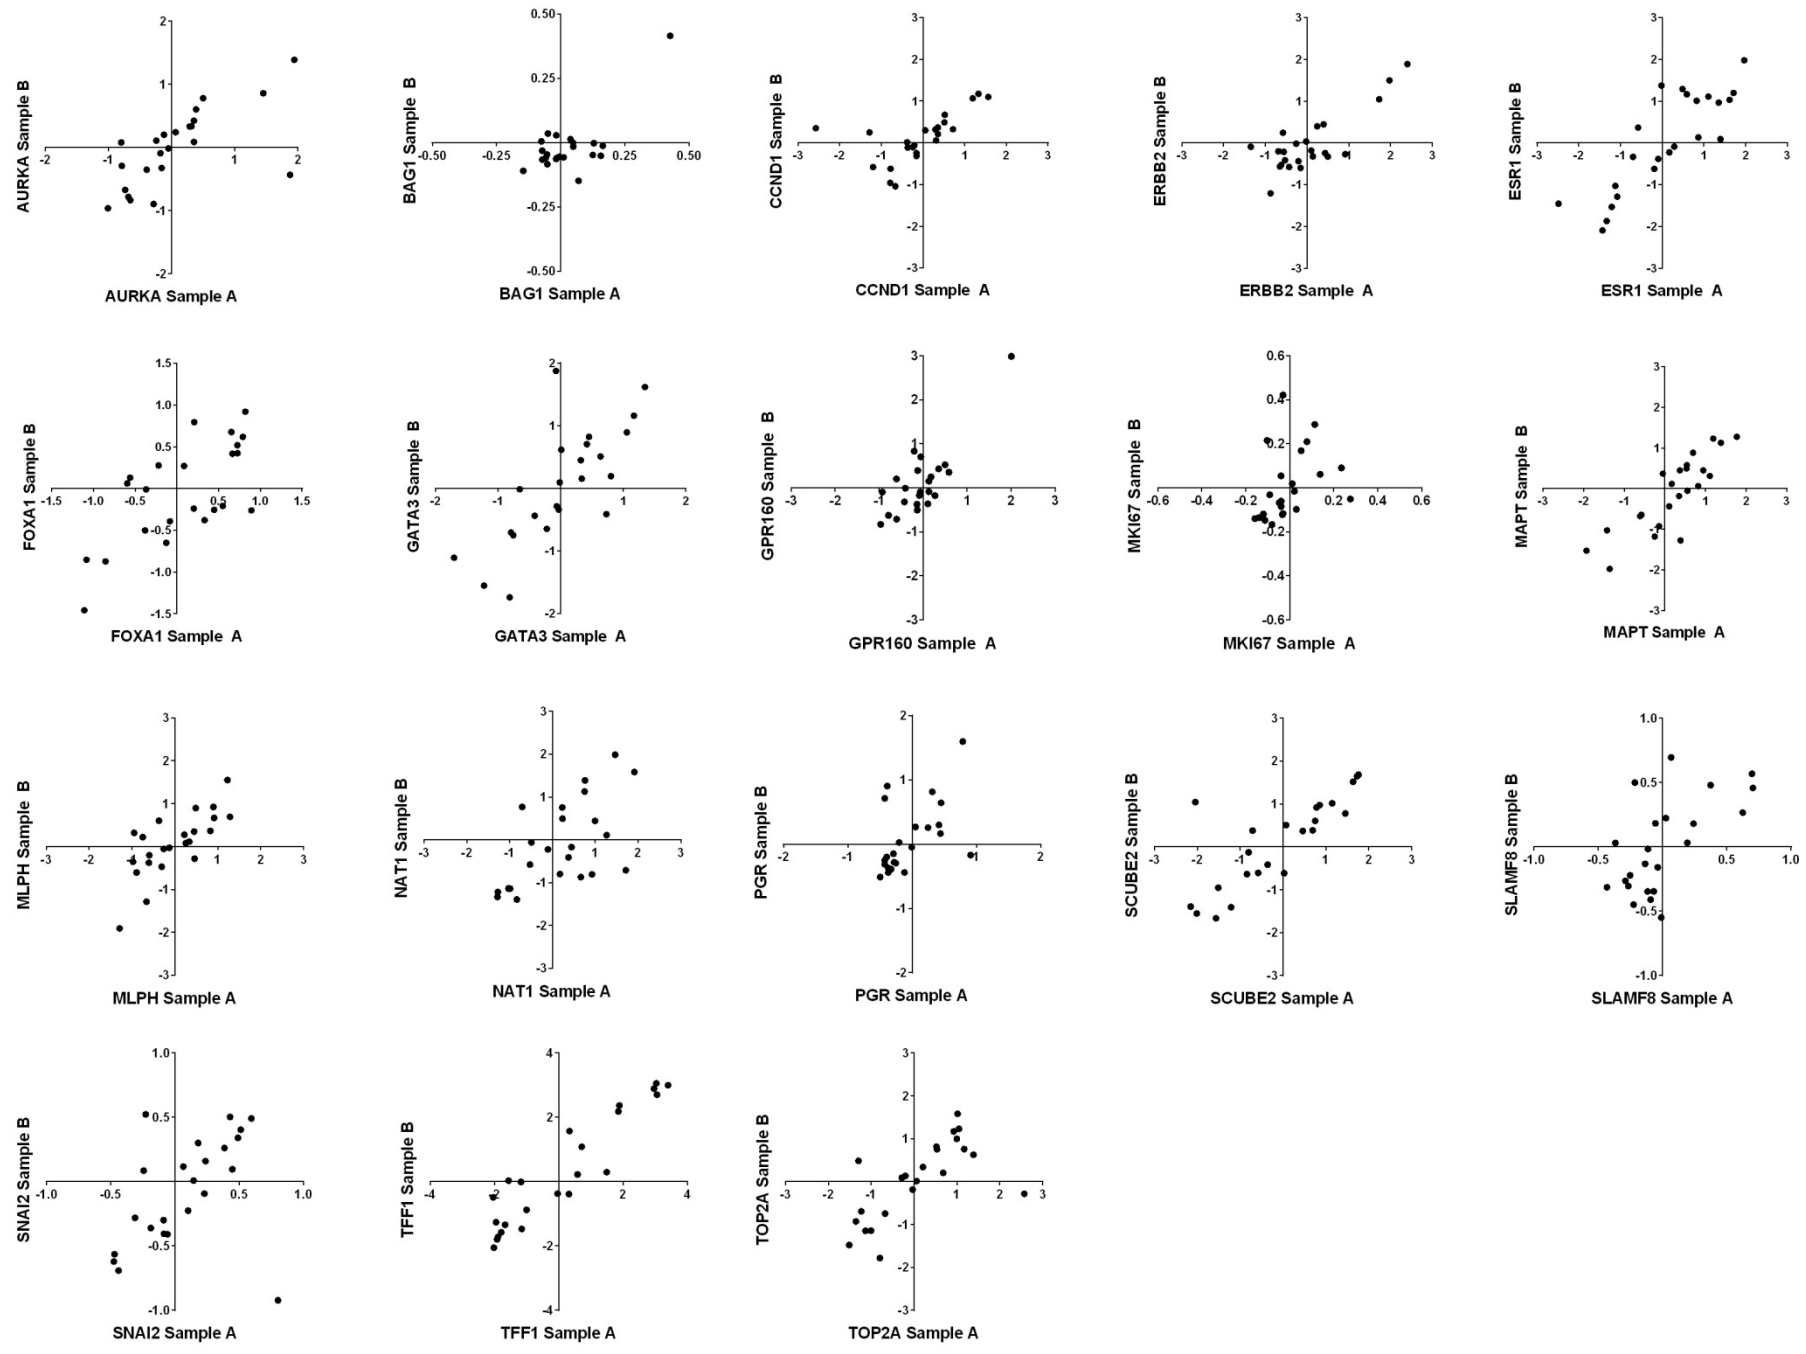

# Figure S4

## A. Study I

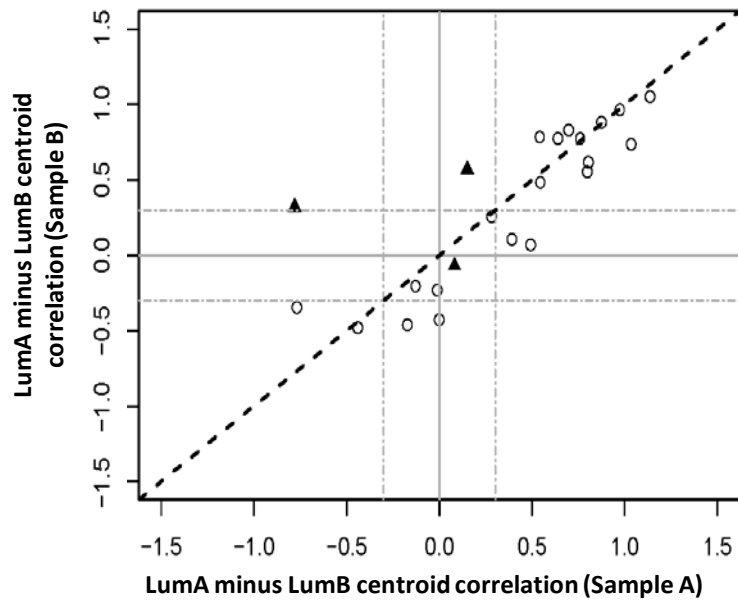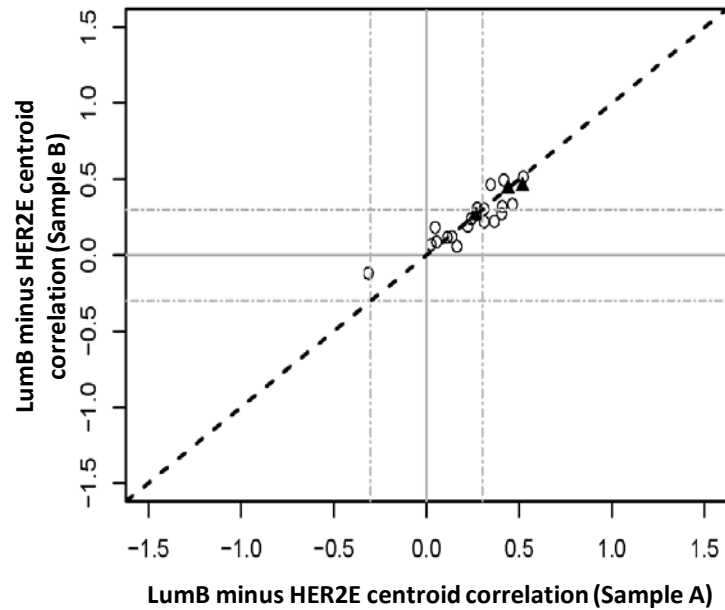

## B. Study II

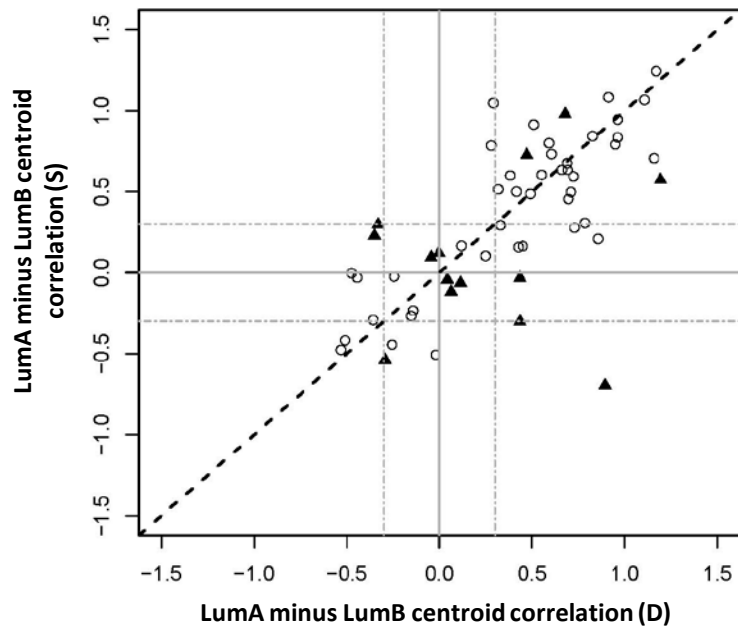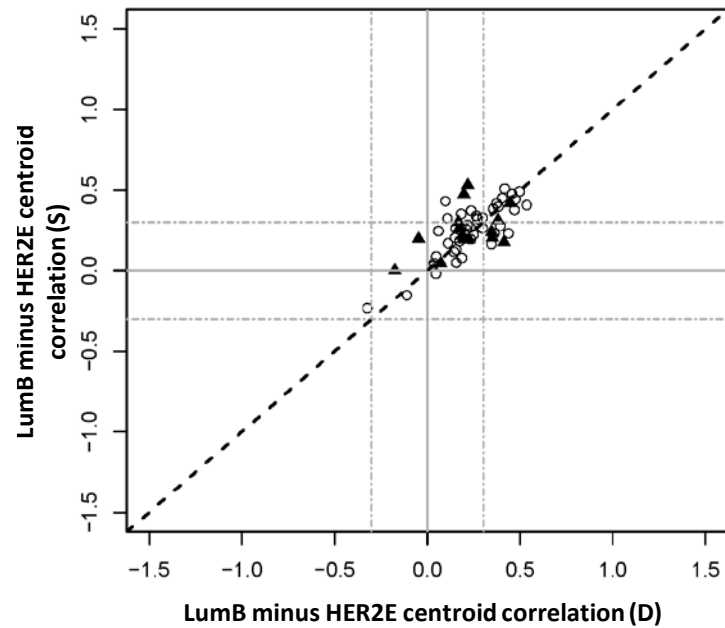

Figure S5

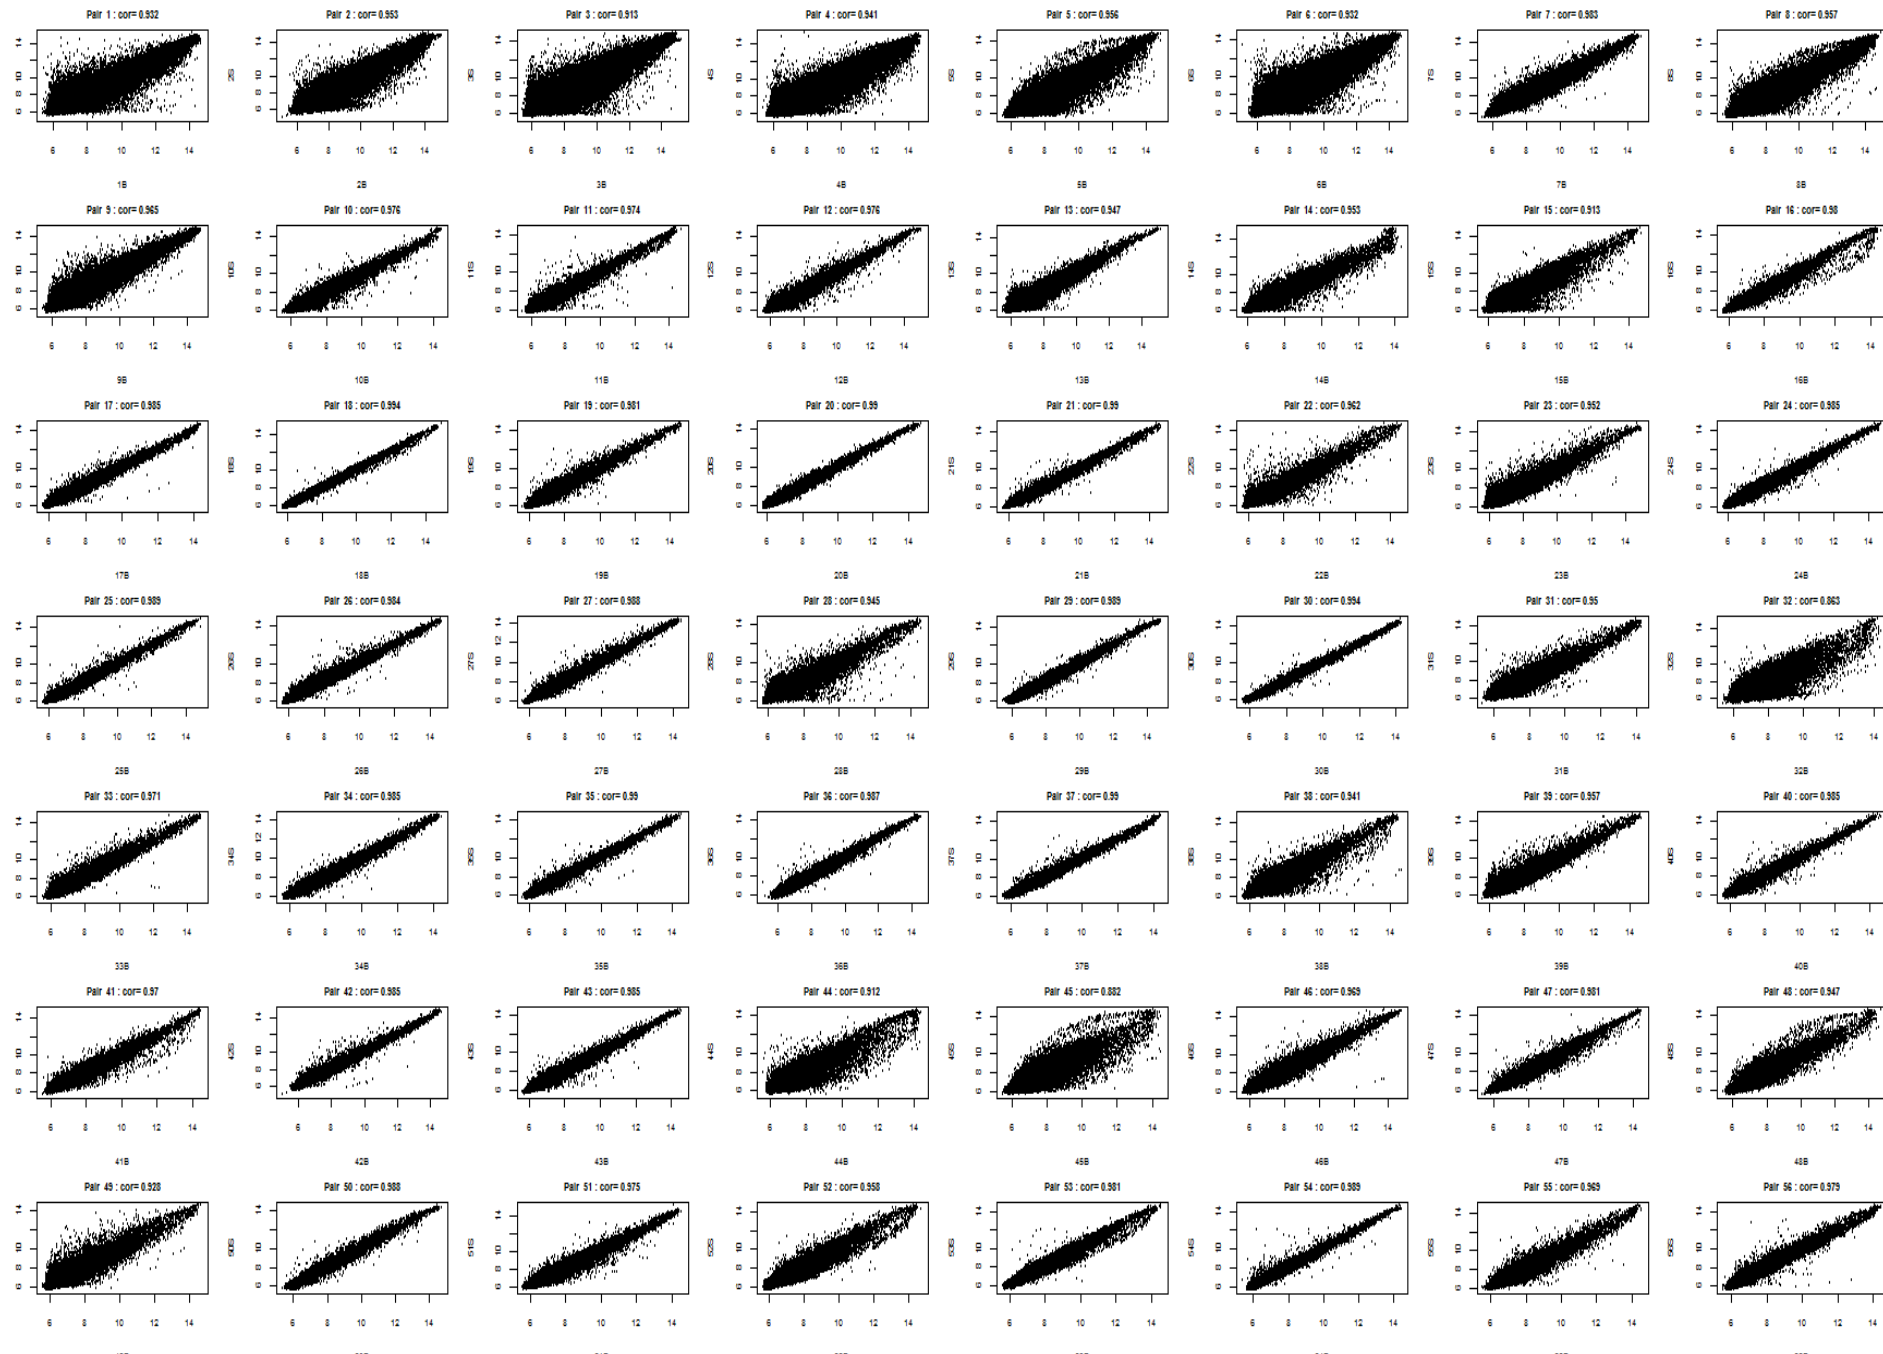

Figure S6

Study II

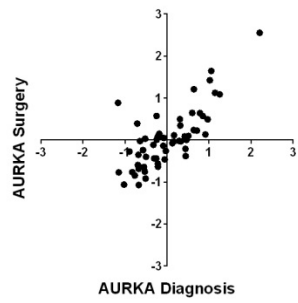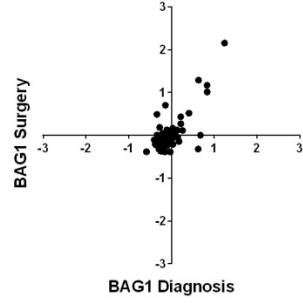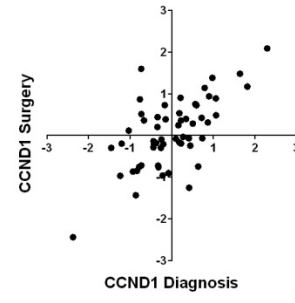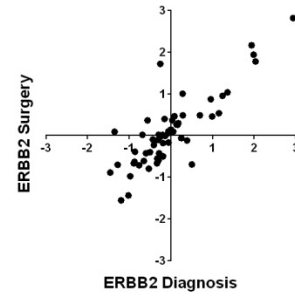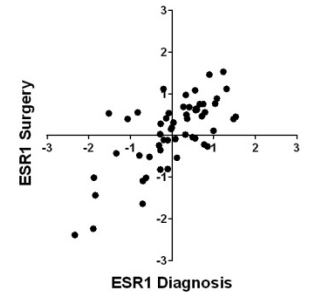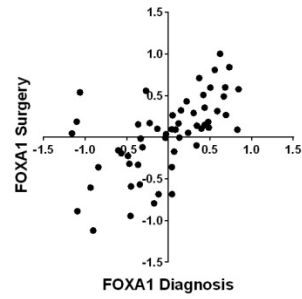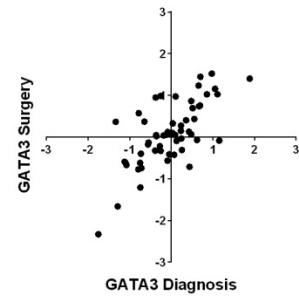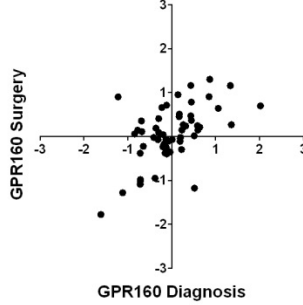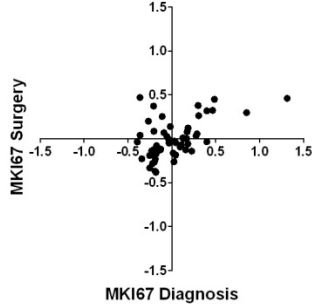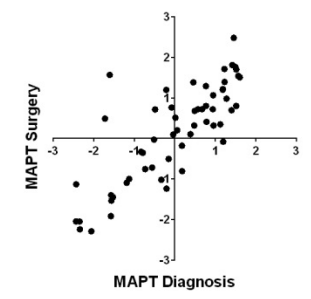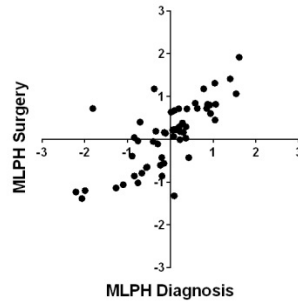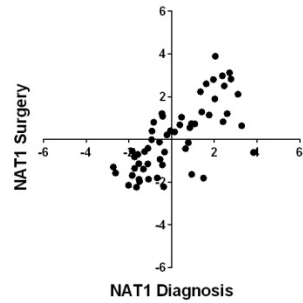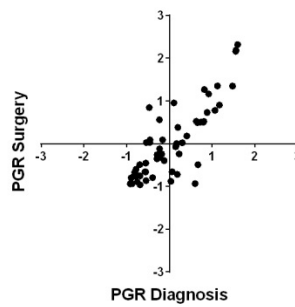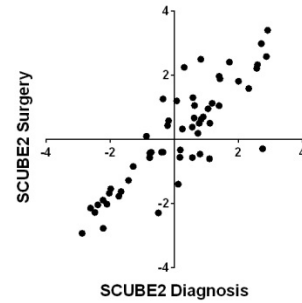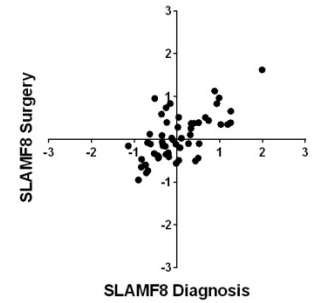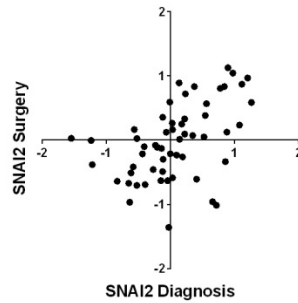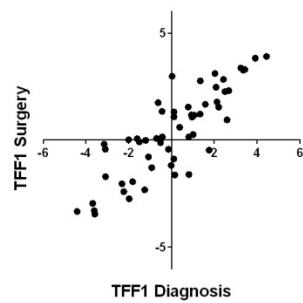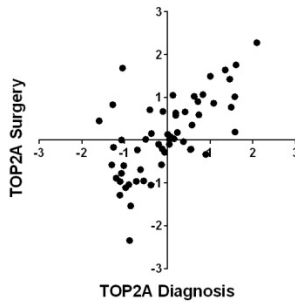

Supplement: MOESM3 [file 10028046]
